# Supplementary material for: Decay-Initiating Endoribonucleolytic Cleavage by RNase Y Is Kept under Tight Control via Sequence Preference and Sub-cellular Localisation
Source: PubMed Central journal article supplement (PMC4608709; doi:10.1371/journal.pgen.1005577), 2015-10-16

Figure S4, RNase Y cleavage sites and ORFs are on the same RNA molecules.

A

| Connection shown by RNAseq |              |                 |                  |
|----------------------------|--------------|-----------------|------------------|
| Cleavage position          | ORF name     | Distance to ORF | Spanning Reads # |
| 832634                     | <i>gapR</i>  | 1               | 14603            |
| 835032                     | <i>pgk</i>   | 7               | 4803             |
| 577452                     | <i>rplA</i>  | 12              | 16938            |
| 2256154                    | SA1985       | 13              | 469              |
| 2256120                    | <i>asp23</i> | 15              | 417              |
| 1338524                    | SA1176       | 17              | 188              |
| 1615364                    | <i>dnaK</i>  | 18              | 821              |
| 1708877                    | <i>tig</i>   | 22              | 900              |
| 504314                     | <i>dnaX</i>  | 22              | 261              |
| 1104307                    | <i>rpmF</i>  | 24              | 8082             |
| 2256134                    | <i>asp23</i> | 29              | 538              |
| 1608932                    | <i>rpsU</i>  | 35              | 118              |
| 1773826                    | <i>tyrS</i>  | 36              | 81               |
| 587364                     | SA0502       | 41              | 440              |
| 587370                     | SA0502       | 47              | 323              |

B

| Connection shown by RT-PCR |                          |                    |
|----------------------------|--------------------------|--------------------|
| Cleavage position          | ORF(s) spanned by RT-PCR | Distance to ORF(s) |
| 2356447                    | SA2095                   | 37                 |
| 970793                     | <i>spxA</i>              | 42                 |
| 1281913                    | <i>cvfA</i>              | 54                 |
| 1266149                    | <i>rpsO</i>              | 74                 |
| 1246042                    | <i>rpsB, tsf</i>         | 75, 106            |
| 1353255                    | SA1186                   | 111                |
| 905860                     | SA0802                   | 113                |
| 1600261                    | <i>glyS</i>              | 115                |
| 590659                     | <i>fus, tuf</i>          | 85, 131            |
| 590703                     | <i>fus, tuf</i>          | 133, 87            |
| 590706                     | <i>fus, tuf</i>          | 136, 84            |
| 590651                     | <i>fus, tuf</i>          | 77, 139            |
| 736004                     | SA0641                   | 144                |
| 1987188                    | SA1734, SA1735           | 0, 168             |
| 1522665                    | <i>fer</i>               | 172                |
| 1696754                    | <i>valS</i>              | 181                |
| 1245947                    | <i>rpsB, tsf</i>         | 0, 201             |
| 1987125                    | SA1734, SA1735           | 0, 231             |
| 1987122                    | SA1734, SA1735           | 0, 234             |
| 590542                     | <i>fus, tuf</i>          | 0, 248             |
| 1068776                    | SA0941, <i>rnjA</i>      | 129, 347           |
| 1068788                    | SA0941, <i>rnjA</i>      | 141, 359           |
| 1068791                    | SA0941, <i>rnjA</i>      | 144, 362           |

C

Primer-pair: *glyS*      *valS*      SA0641  
 PCR-length: 572 bp    619 bp    643 bp  
 RT: - +    - +    - +

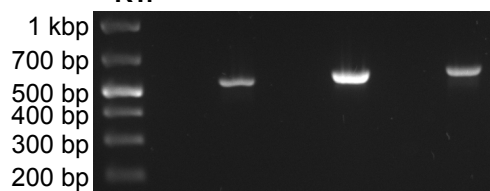

Primer-pair: *fus-tuf*    SA1186    SA2095    *spxA*    *cvfA*  
 PCR-length: 517 bp    435 bp    678 bp    462 bp    536 bp  
 RT: - +    - +    - +    - +    - +

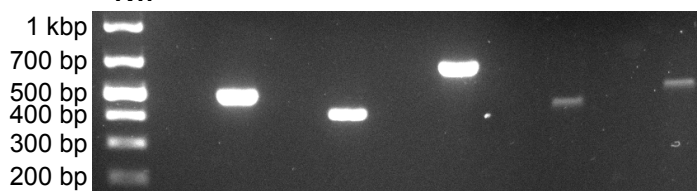

Primer-pair: SA0941    *tsf*    *rpsO*    SA1735    *fer*    SA0802  
 PCR-length: 587 bp    630 bp    358 bp    535 bp    445 bp    510 bp  
 RT: - +    - +    - +    - +    - +    - +

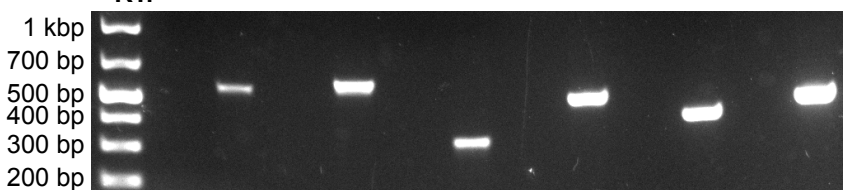

Supplement: pgen.1005577.s005.pdf [file pgen.1005577.s005.pdf]
