# Supplementary material for: Decay-Initiating Endoribonucleolytic Cleavage by RNase Y Is Kept under Tight Control via Sequence Preference and Sub-cellular Localisation
Source: PubMed Central journal article supplement (PMC4608709; doi:10.1371/journal.pgen.1005577), 2015-10-16

**A**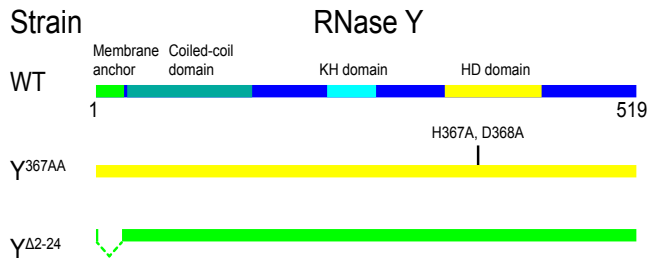**B**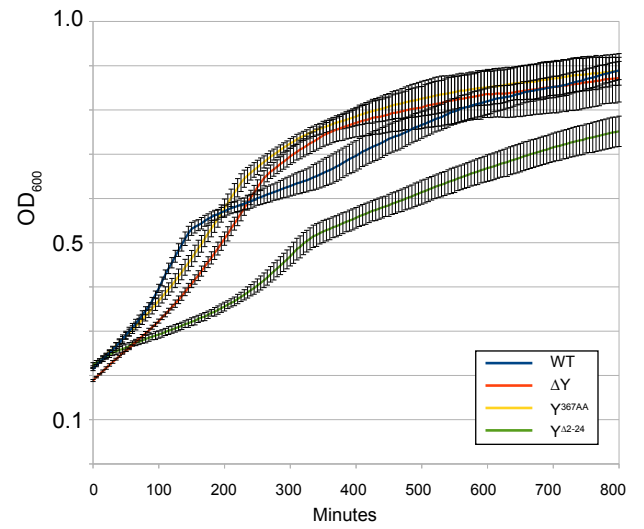**C**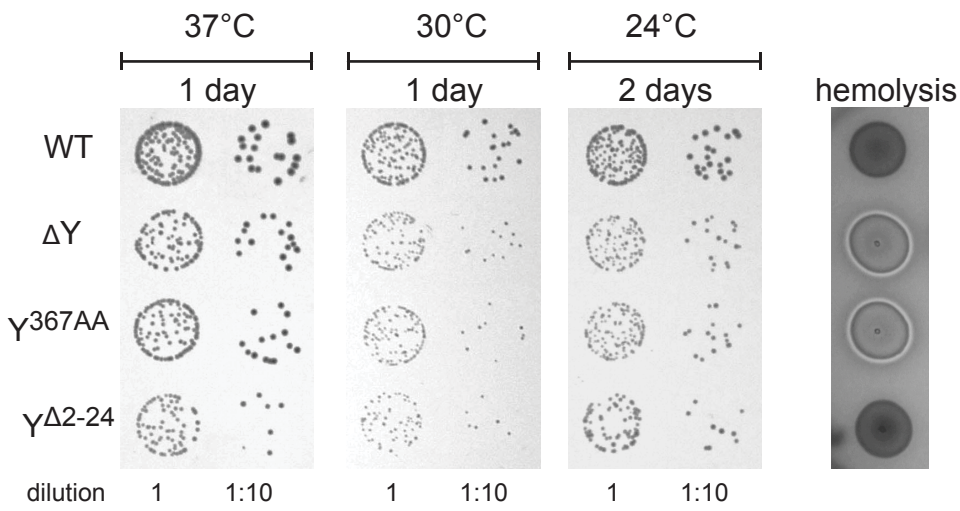**D**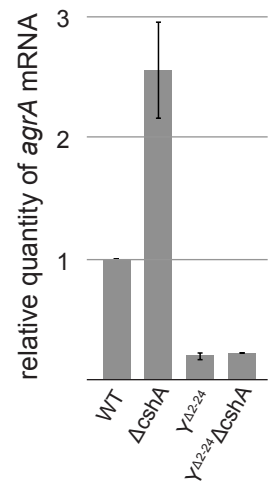**E**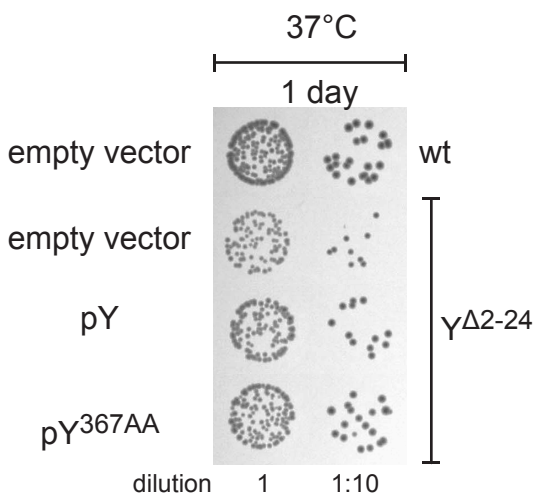**F**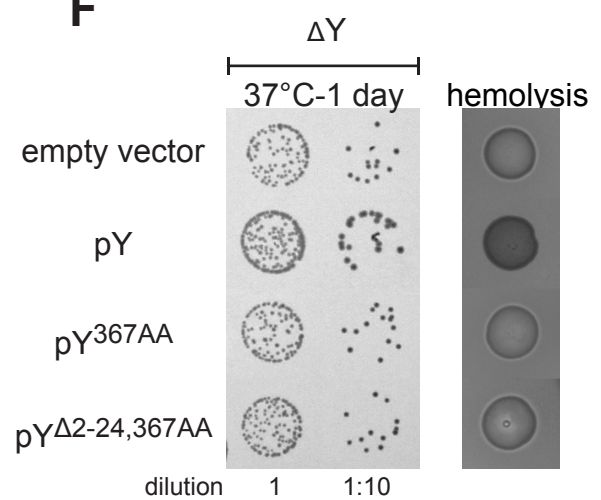

Supplement: pgen.1005577.s004.pdf [file pgen.1005577.s004.pdf]
